# Supplementary material for: A terpene synthase-cytochrome P450 cluster in Dictyostelium discoideum produces a novel trisnorsesquiterpene
Source: eLife journal article supplement (doi:10.7554/elife.44352), 2019-05-07
Supplement: supp [file elife_poa_e44352_Figure_1_figure_supplement_1.pdf › elife_poa_e44352_Figure_1_figure_supplement_1.pdf]

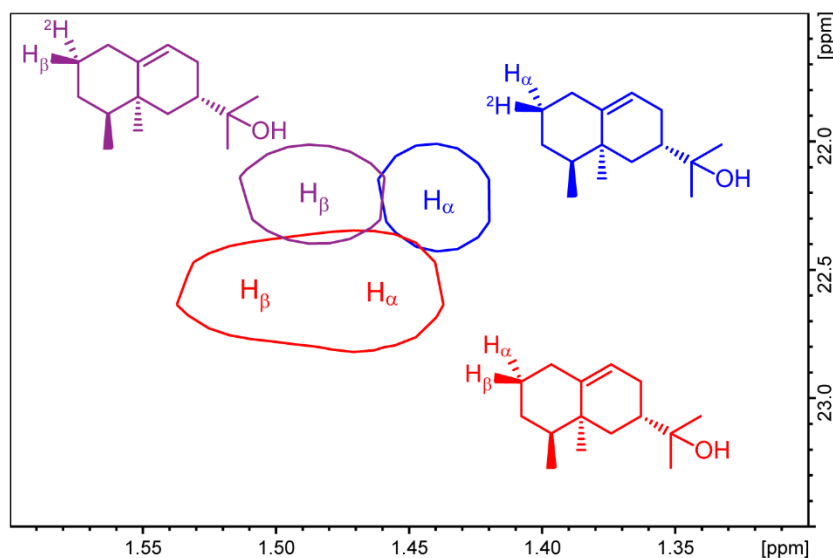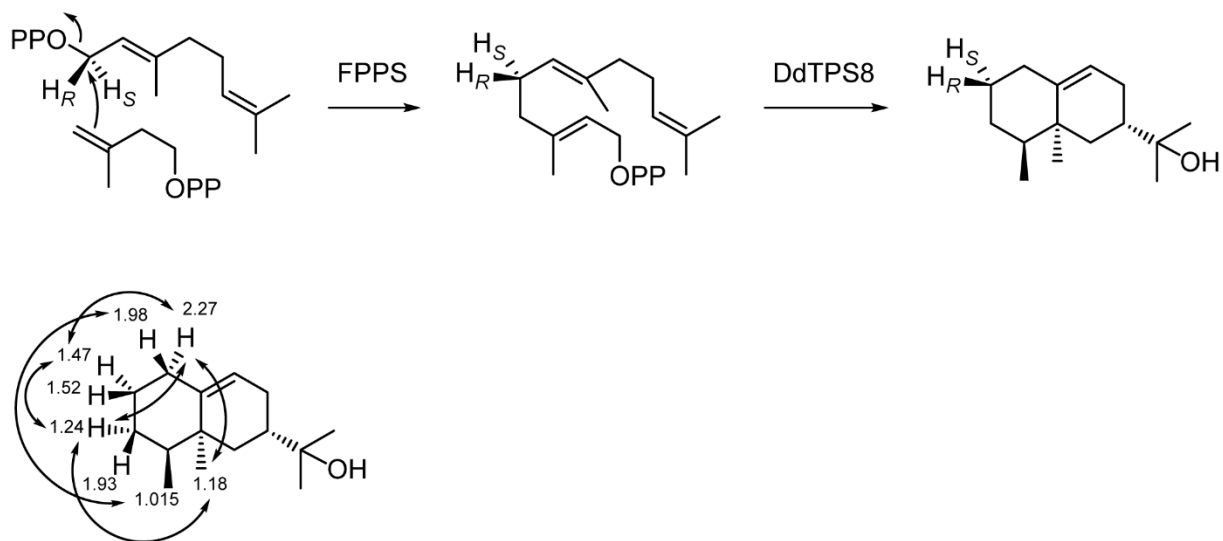

**Figure 1 – figure supplement 1.** Determination of the absolute configuration of discoidol. The HSQC for C2 of unlabelled discoidol (red) shows a broad crosspeak for coupling with  $H_\alpha$  (1.47 ppm) and  $H_\beta$  (1.52 ppm). The enzymatic conversion of (*S*)-(1- $^{13}\text{C}$ ,1- $^2\text{H}$ )GPP ( $H_S=^2\text{H}$ ) and IPP with FPP synthase (FPPS) and DdTPS8 results in labelled discoidol with a remaining crosspeak for  $H_\beta$  (purple), while labelled discoidol obtained from (*R*)-(1- $^{13}\text{C}$ ,1- $^2\text{H}$ )GPP ( $H_R=^2\text{H}$ ) shows a remaining crosspeak for  $H_\alpha$  (blue). The known absolute configuration at C2 of both enantioselectively deuterated isotopomers of discoidol together with the assignment of the relative orientations of  $H_\alpha$  and  $H_\beta$  at C2 by NOESY allows to conclude on the absolute configuration of (4*S*,5*S*,7*S*)-discoidol.
