# Supplementary material for: A terpene synthase-cytochrome P450 cluster in Dictyostelium discoideum produces a novel trisnorsesquiterpene
Source: eLife journal article supplement (doi:10.7554/elife.44352), 2019-05-07
Supplement: supp [file elife_poa_e44352_Figure_1_figure_supplement_2.pdf › elife_poa_e44352_Figure_1_figure_supplement_2.pdf]

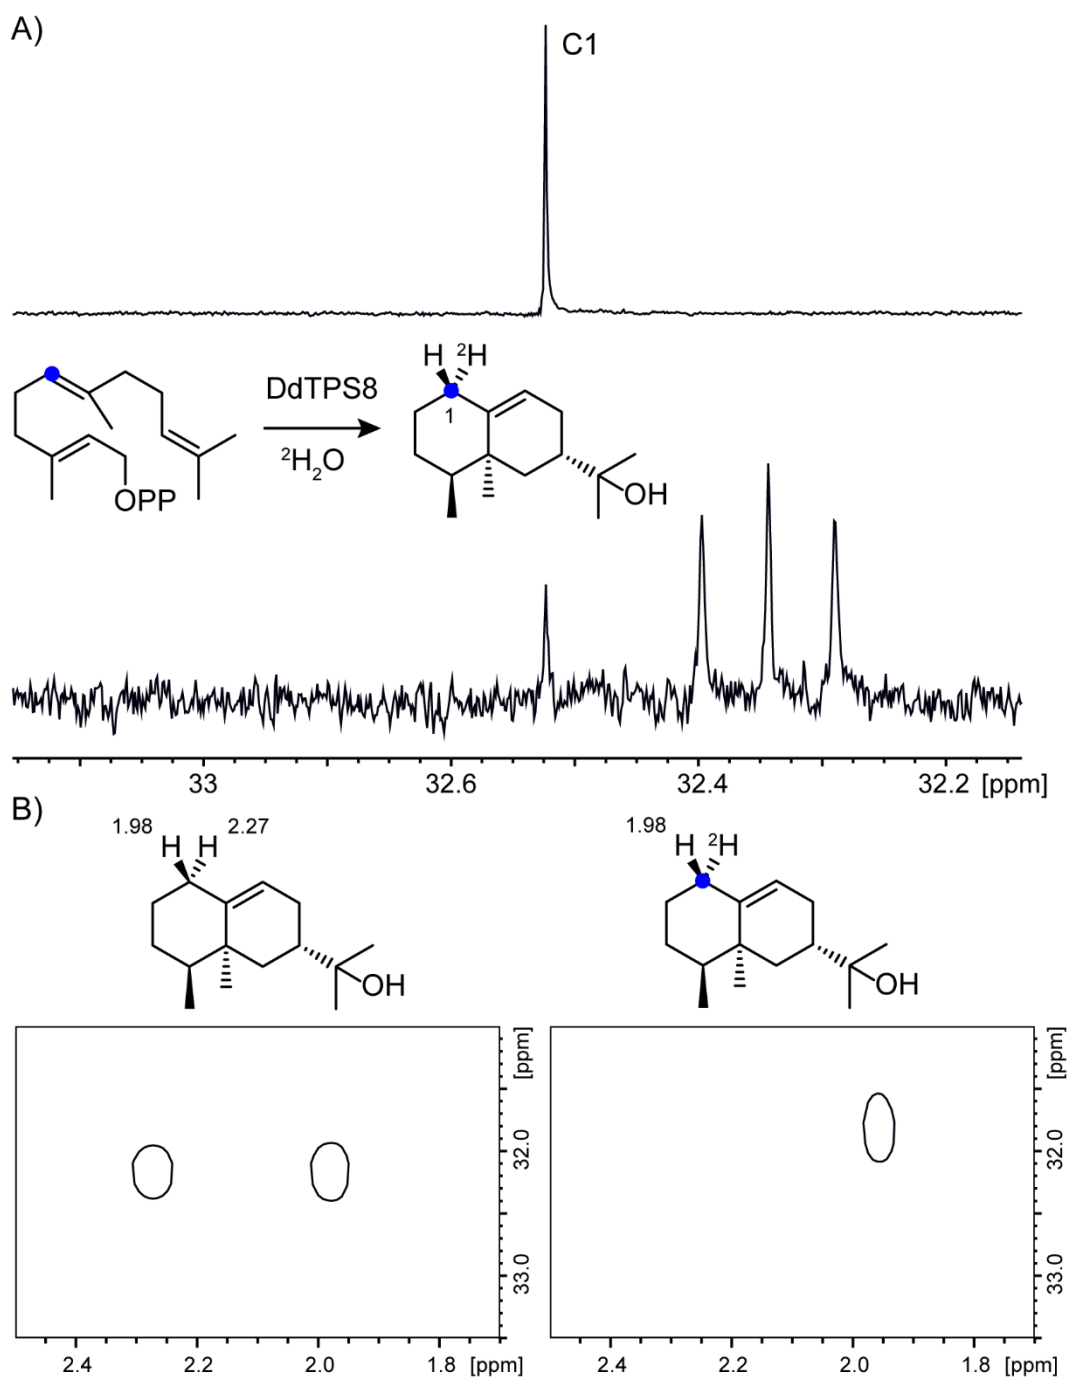

**Figure 1 – figure supplement 2.** Investigation of the reprotonation step in the cyclization mechanism of discoidol. A) Incubation of (6- $^{13}\text{C}$ )FPP in deuterium oxide buffer with discoidol synthase (DdTPS8) results in a triplet for C1 of discoidol due to  $^{13}\text{C}$ - $^2\text{H}$  spin coupling. B) HSQC analysis of the obtained labeled material demonstrates the stereospecific incorporation of deuterium into H1<sub>a</sub>. Blue dots indicate  $^{13}\text{C}$ -labeled carbons.
