# Supplementary material for: A terpene synthase-cytochrome P450 cluster in Dictyostelium discoideum produces a novel trisnorsesquiterpene
Source: eLife journal article supplement (doi:10.7554/elife.44352), 2019-05-07
Supplement: supp [file elife_poa_e44352_Figure_1_figure_supplement_3.pdf › elife_poa_e44352_Figure_1_figure_supplement_3.pdf]

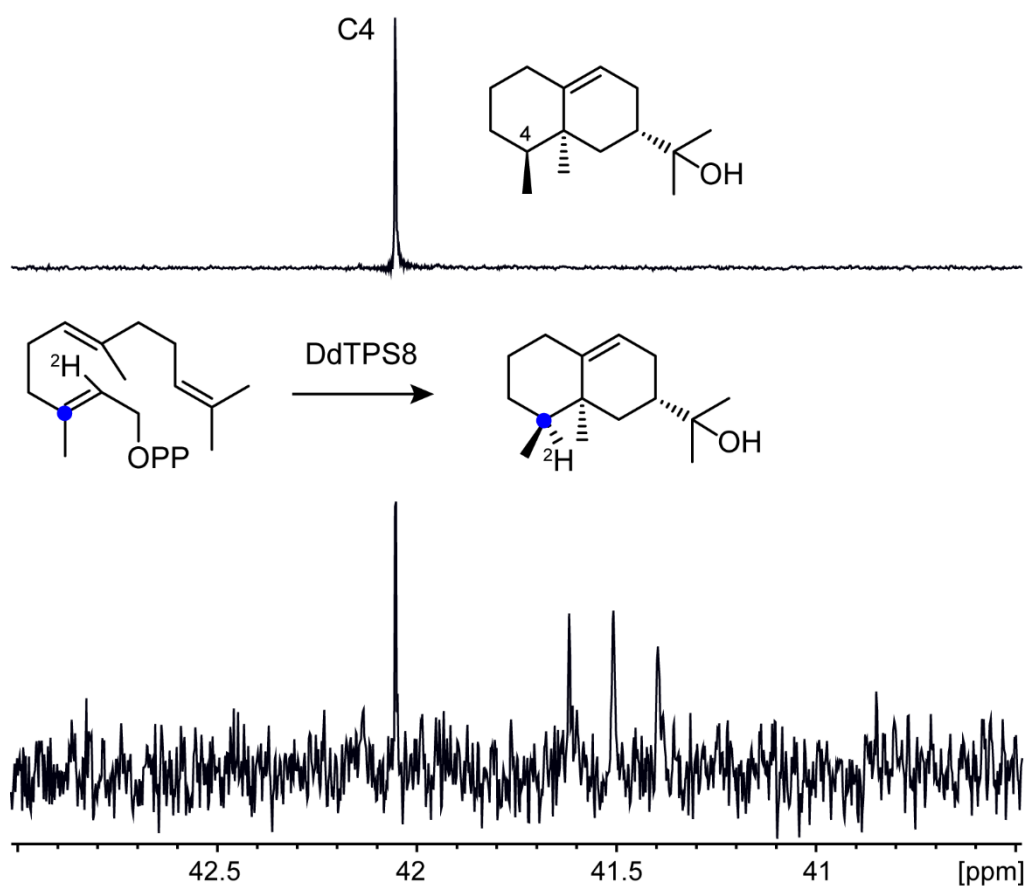

**Figure 1 – figure supplement 3.** Investigation of the 1,2-hydride migration by incubation of (3- $^{13}\text{C}$ ,2- $^2\text{H}$ )FPP with DdTPS8.
