# Supplementary material for: A terpene synthase-cytochrome P450 cluster in Dictyostelium discoideum produces a novel trisnorsesquiterpene
Source: eLife journal article supplement (doi:10.7554/elife.44352), 2019-05-07
Supplement: supp [file elife_poa_e44352_Figure_2_figure_supplement_1.pdf › elife_poa_e44352_Figure_2_figure_supplement_1.pdf]

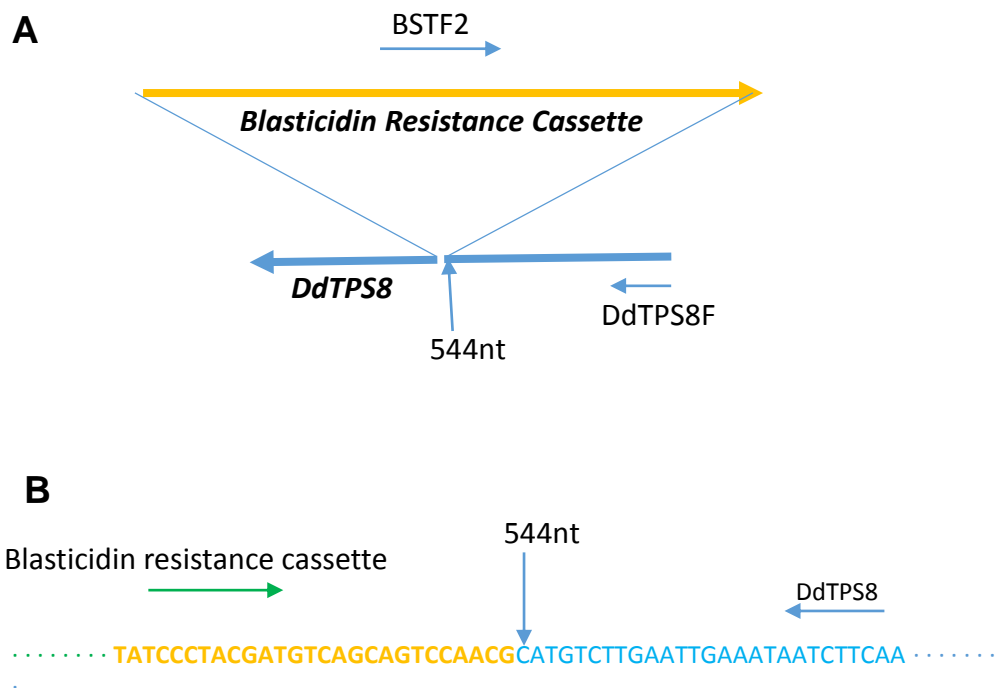

**Figure 2 – figure supplement 1.** Verification of *DdTPS8* insertion mutant. A, schematic presentation of *DdTPS8* gene with an insert of the blasticidin resistance cassette. One *DdTPS8*-specific primer DdTPS8F (5' –ATGGATTATGATATAAAATTTACTTGGGA-3') and one insert-specific primer BSTF2 (5'-GTAGGGAGTTGATTTCAGACTATGCAC-3') were designed for genomic PCR. B. sequencing result of partial PCR fragment with blue indicating *DdTPS8* sequence and Orange indicating insert sequence.
