# Supplementary material for: A terpene synthase-cytochrome P450 cluster in Dictyostelium discoideum produces a novel trisnorsesquiterpene
Source: eLife journal article supplement (doi:10.7554/elife.44352), 2019-05-07
Supplement: supp [file elife_poa_e44352_Figure_4_figure_supplement_1.pdf › elife_poa_e44352_Figure_4_figure_supplement_1.pdf]

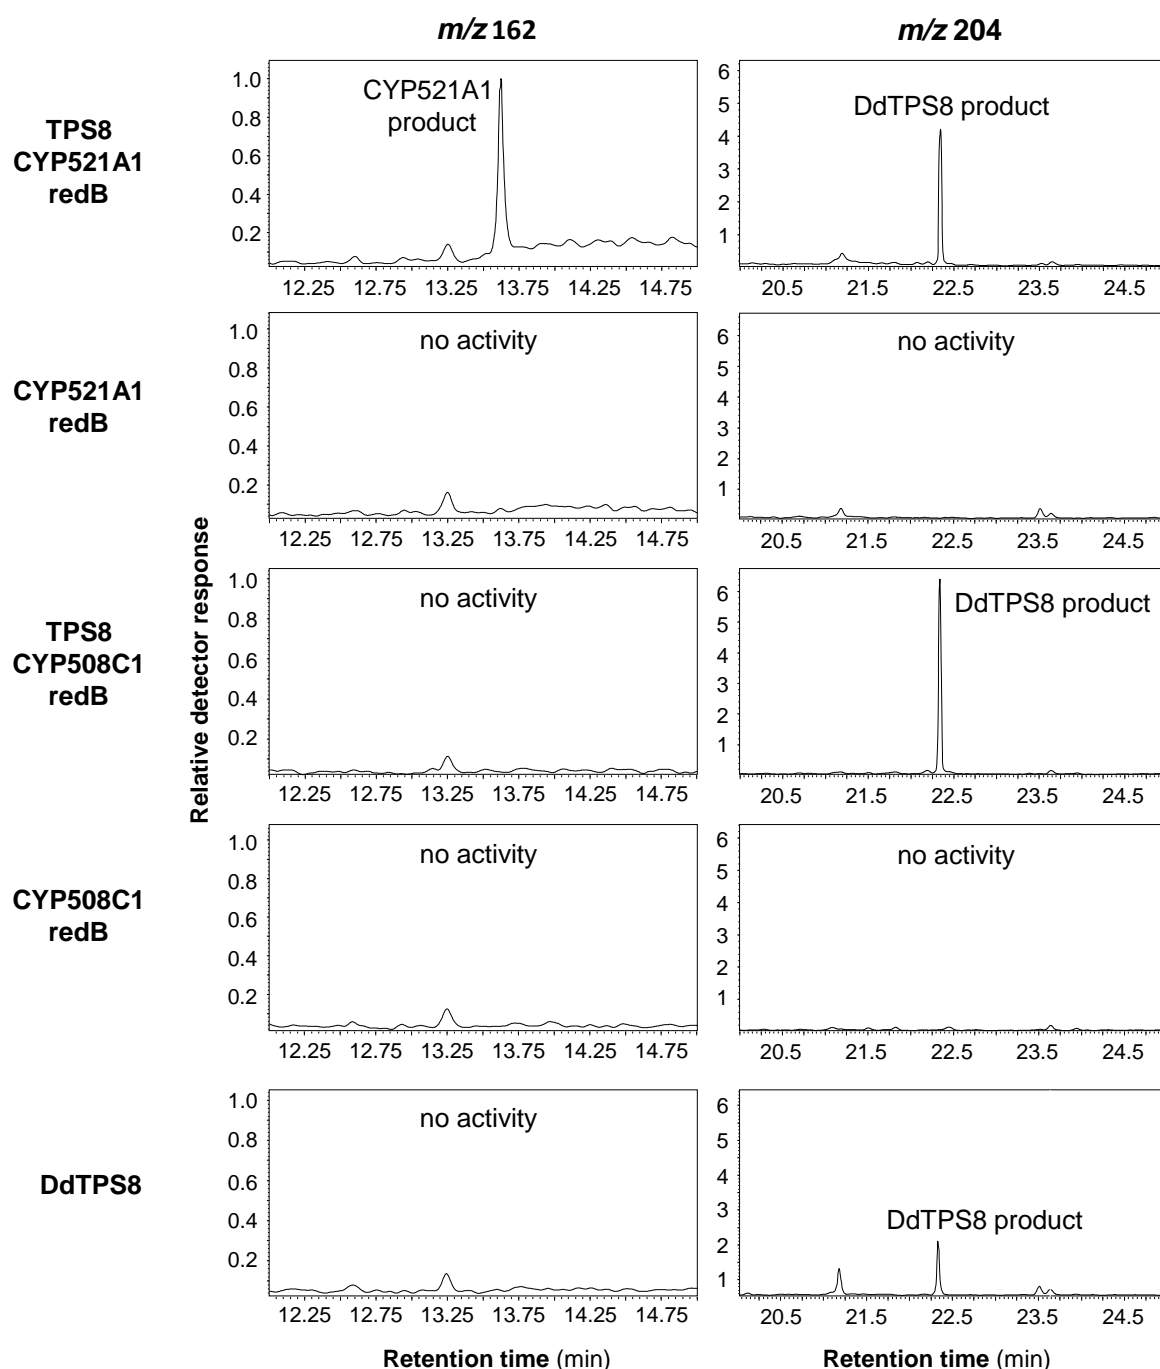

**Figure 4 – figure supplement 1.** Activity of DdTPS8 and CYP521A1 in cell-free enzyme assays in the presence of (*E,E*)-FPP. Genes were coexpressed in *E. coli* Bl21-DE3-Star in different combinations. Crude protein extracts were incubated with (*E,E*)-FPP and volatiles were collected from the headspace of the assay using PDMS tubes. Product analysis was done by GC-TDU-MS. The extracted ion chromatograms for *m/z* 162 (CYP521A1 product) and *m/z* 204 (DdTPS8 product) are shown.
