# Supplementary material for: A terpene synthase-cytochrome P450 cluster in Dictyostelium discoideum produces a novel trisnorsesquiterpene
Source: eLife journal article supplement (doi:10.7554/elife.44352), 2019-05-07
Supplement: supp [file elife_poa_e44352_Figure_5_figure_supplement_1.pdf › elife_poa_e44352_Figure_5_figure_supplement_1.pdf]

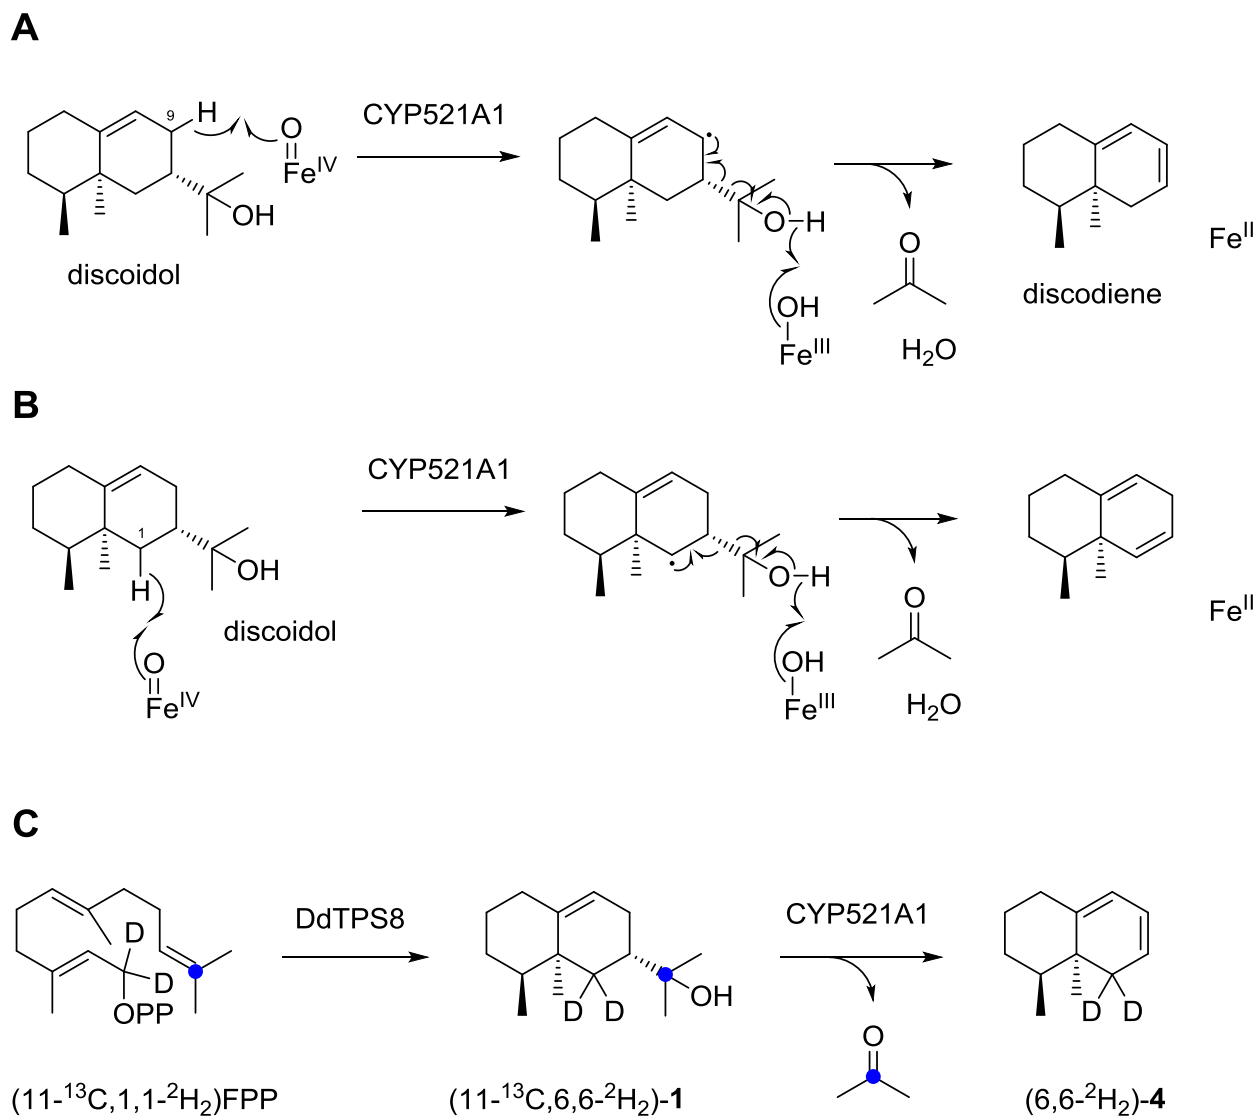

**Figure 5 – figure supplement 1.** Formation of discodiene by CYP521A1. A) Mechanism of the oxidative degradation of discoidol by CYP521A1 initiated by hydrogen abstraction from C-9. B) an alternative mechanism with initial hydrogen abstraction from C-1. C) Labeling experiment that is in line with mechanism A), but not with mechanism B), supporting the structure of discodiene as the CYP521A1 product.
