# Supplementary figures and images for: A terpene synthase-cytochrome P450 cluster in Dictyostelium discoideum produces a novel trisnorsesquiterpene
Source: eLife journal article supplement (doi:10.7554/elife.44352), 2019-05-07

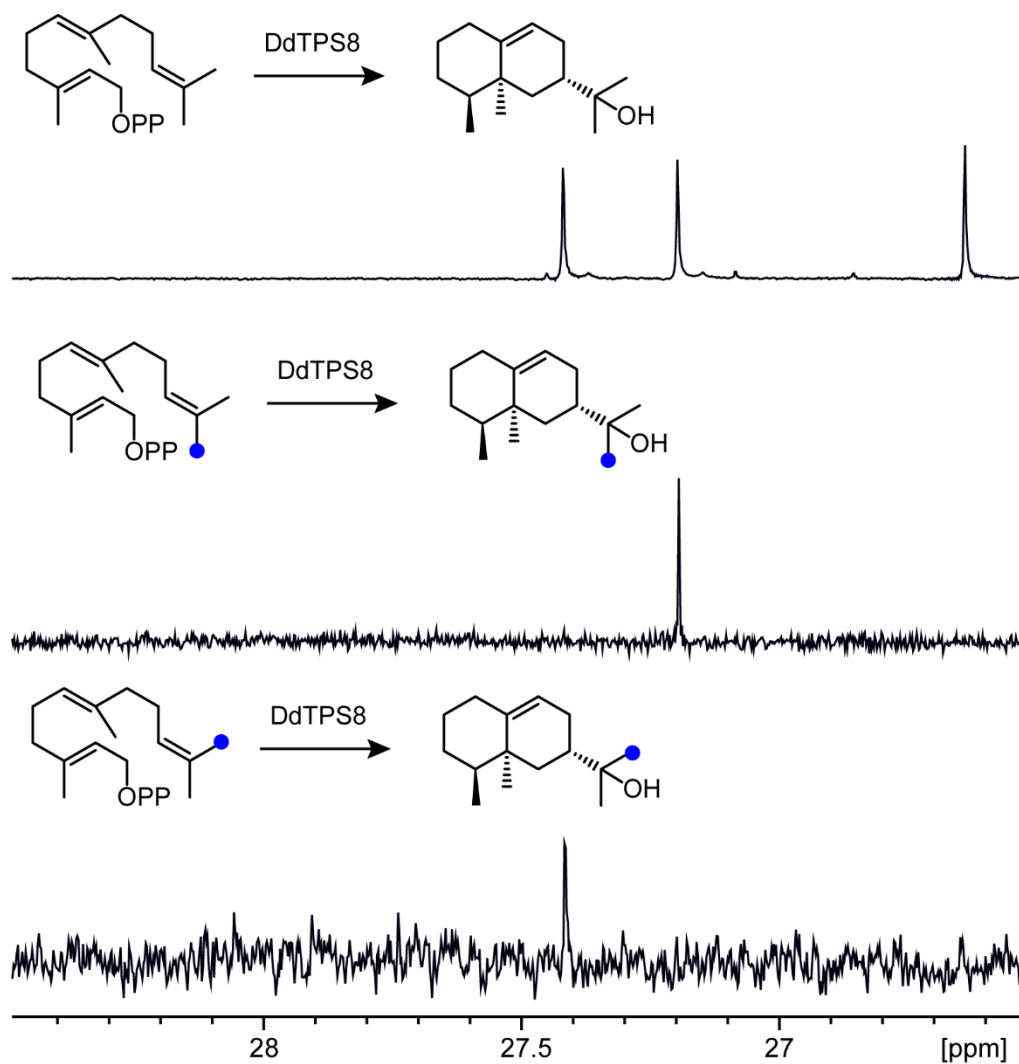

**Figure 1 – figure supplement 4.** Incubation experiments with (12- $^{13}\text{C}$ )FPP and (13- $^{13}\text{C}$ )FPP and DdTPS8.

Supplement: supp [file elife_poa_e44352_Figure_1_figure_supplement_4.pdf › elife_poa_e44352_Figure_1_figure_supplement_4.pdf]
